# Supplementary material for: Salt formation of cabozantinib with hydrochloric and hydrobromic acids – influence on the in vitro dissolution behavior and food effect
Source: Royal Society of Chemistry journal article supplement (doi:10.1039/d4ce01278j), 2025-01-01
Supplement: d4ce01278j1.pdf [file d4ce01278j1.pdf]

**Salt formation of cabozantinib with hydrochloric and hydrobromic acids-  
influence on in-vitro dissolution behavior and food effect**

Sreela Ramesh, Eliška Zmeškalová, Monika Kučeráková, Vít Zvoníček, Miroslav Šooš

**Supplementary material**

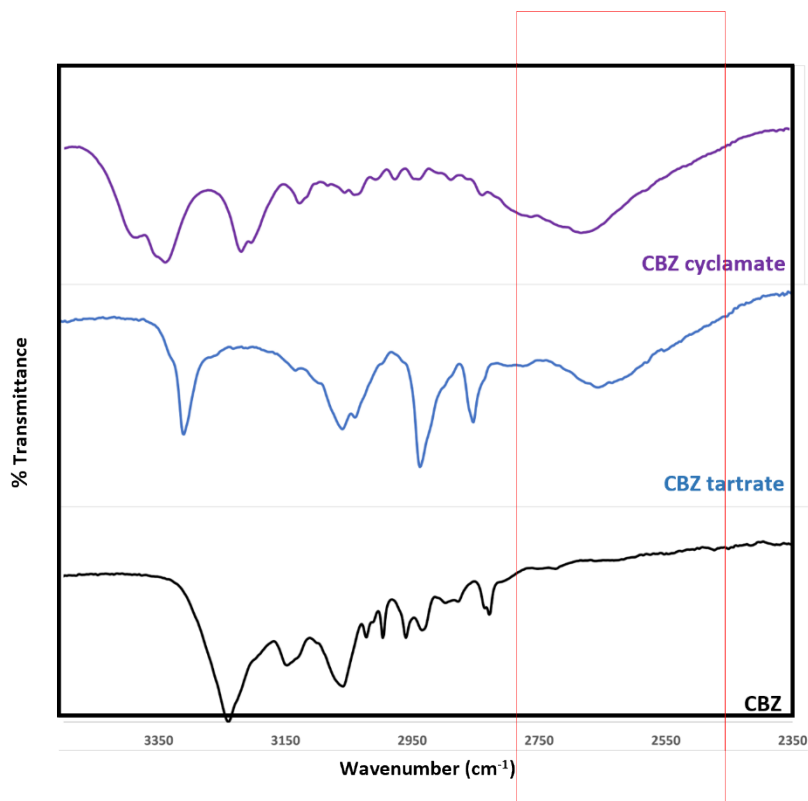

Fig. S1 IR spectra (wavenumber region 2300 cm<sup>-1</sup> to 3500 cm<sup>-1</sup>) of CBZ saccharinate and CBZ tartrate compared to that of CBZ.

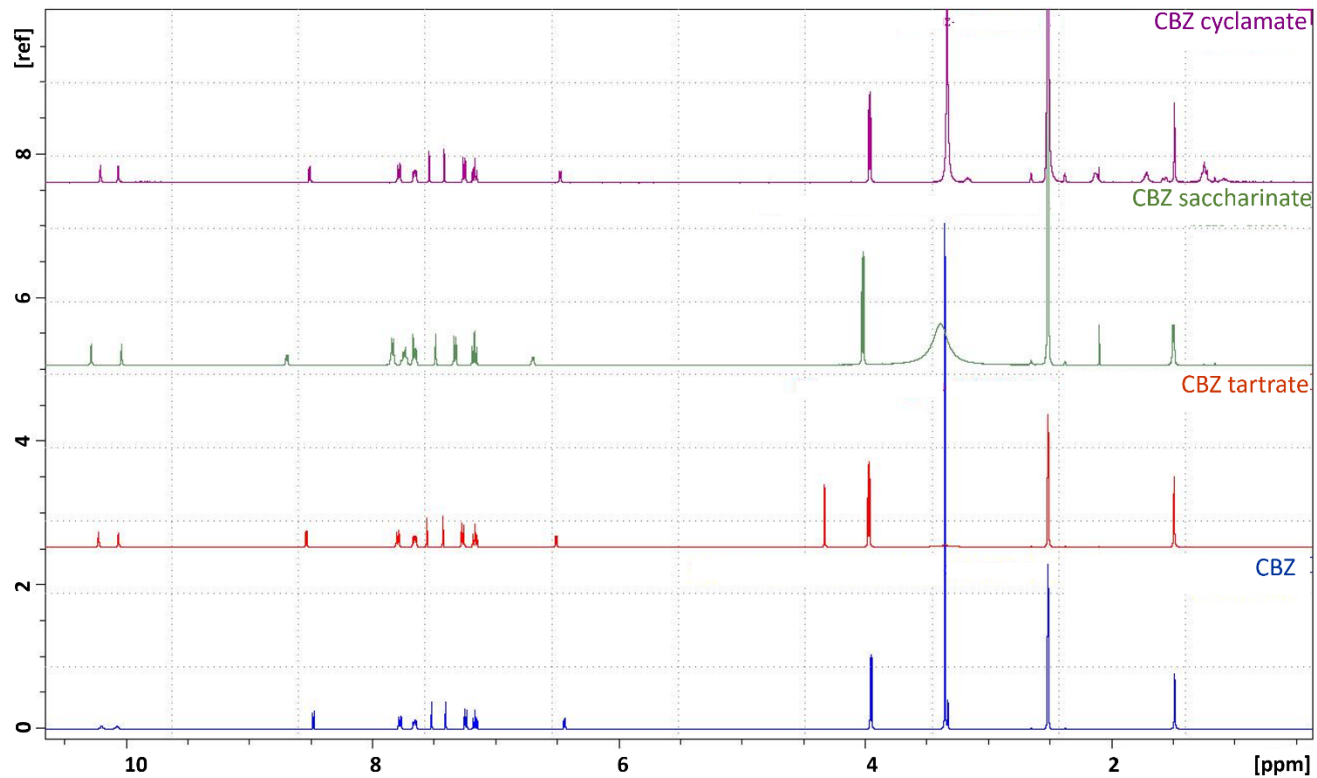

Fig S2 Solution <sup>1</sup>H NMR of CBZ, CBZ saccharinate, CBZ cyclamate and CBZ tartrate

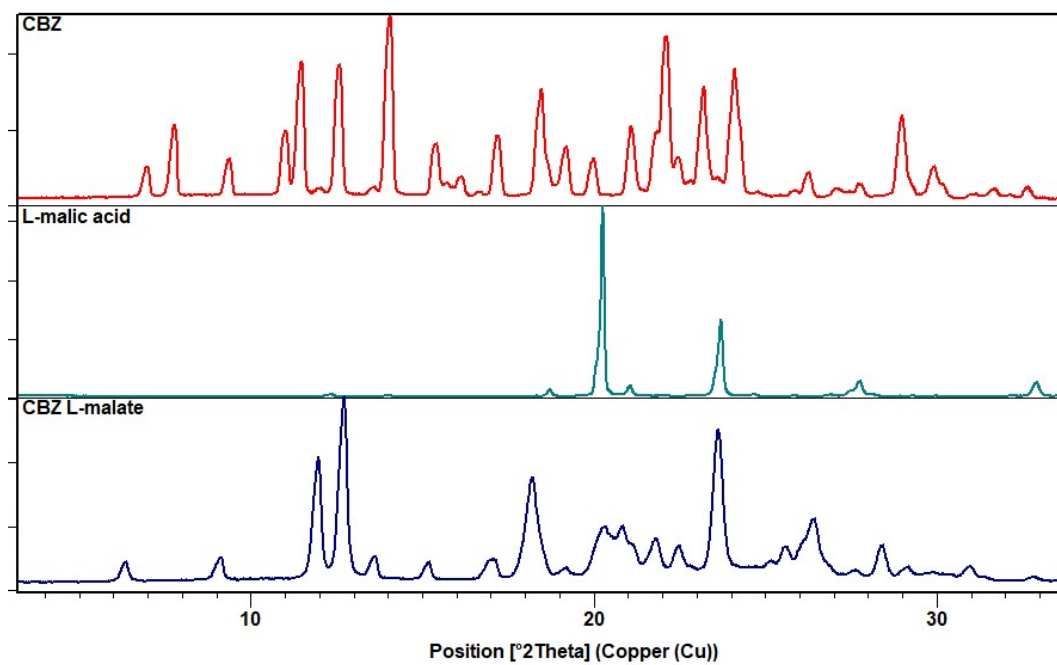

Fig S3 XRPD pattern of CBZ L-malate salt compared to the starting materials

## Section S1

## Comparison of XRPD patterns of salts to starting materials

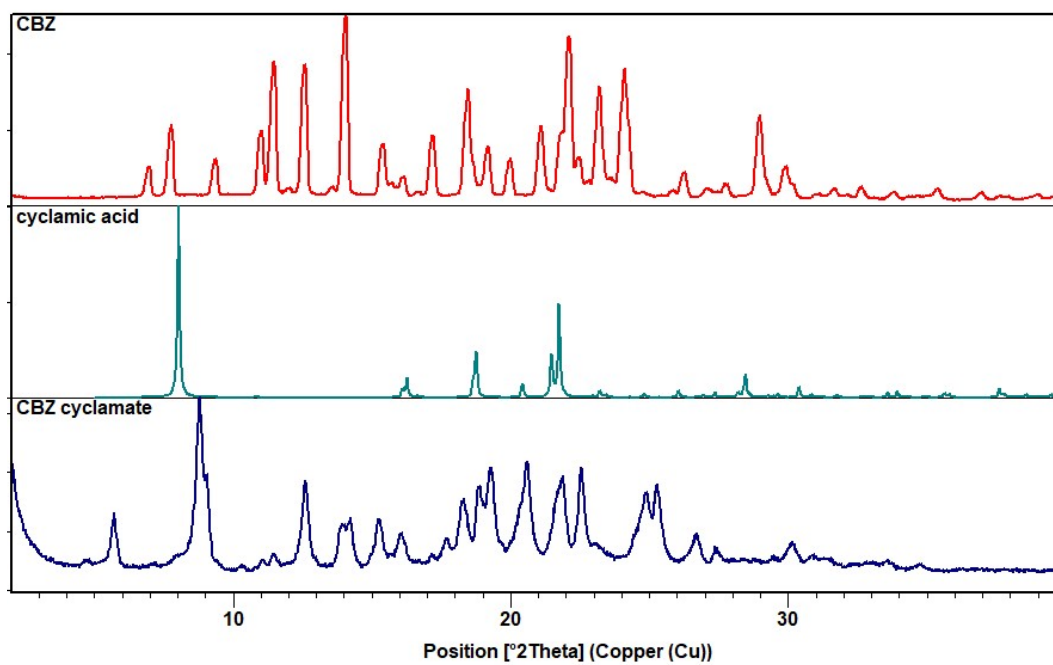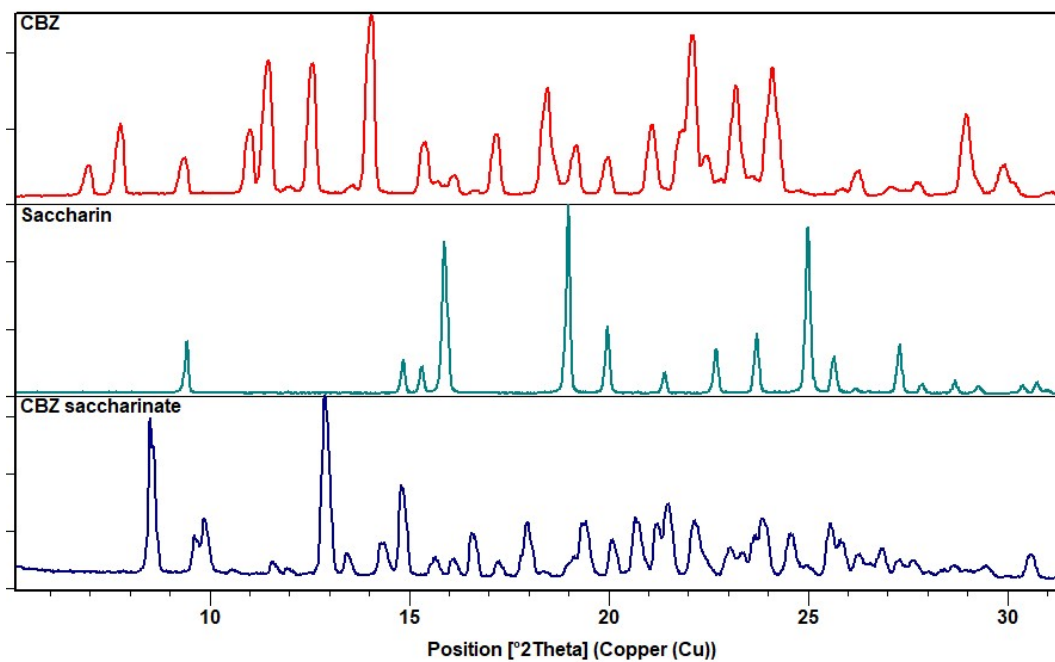

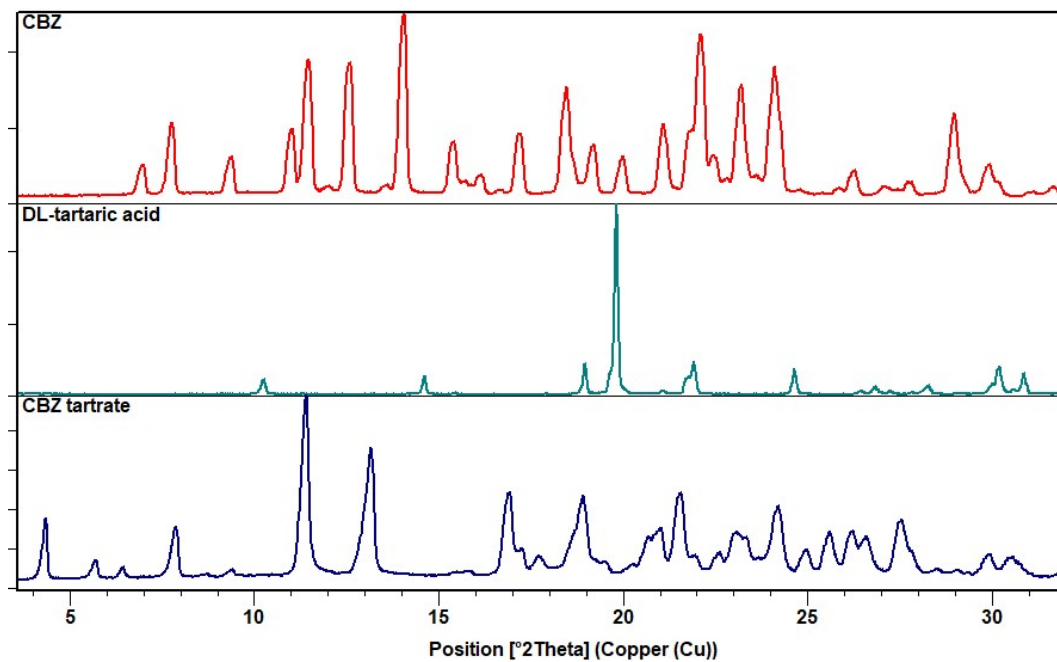

## Section S2

IDR curves recorded at pH 6.8 in phosphate buffer solution with 0.1% SDS

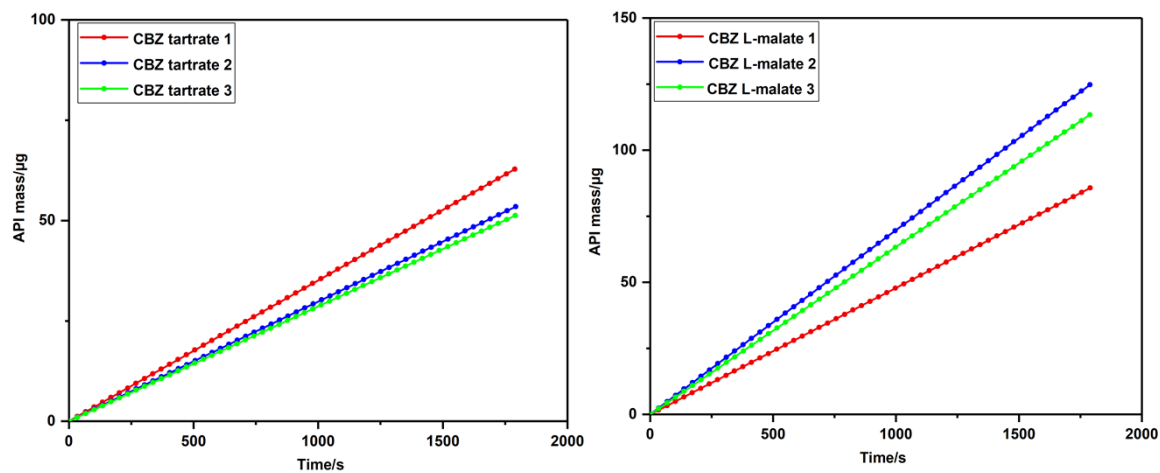

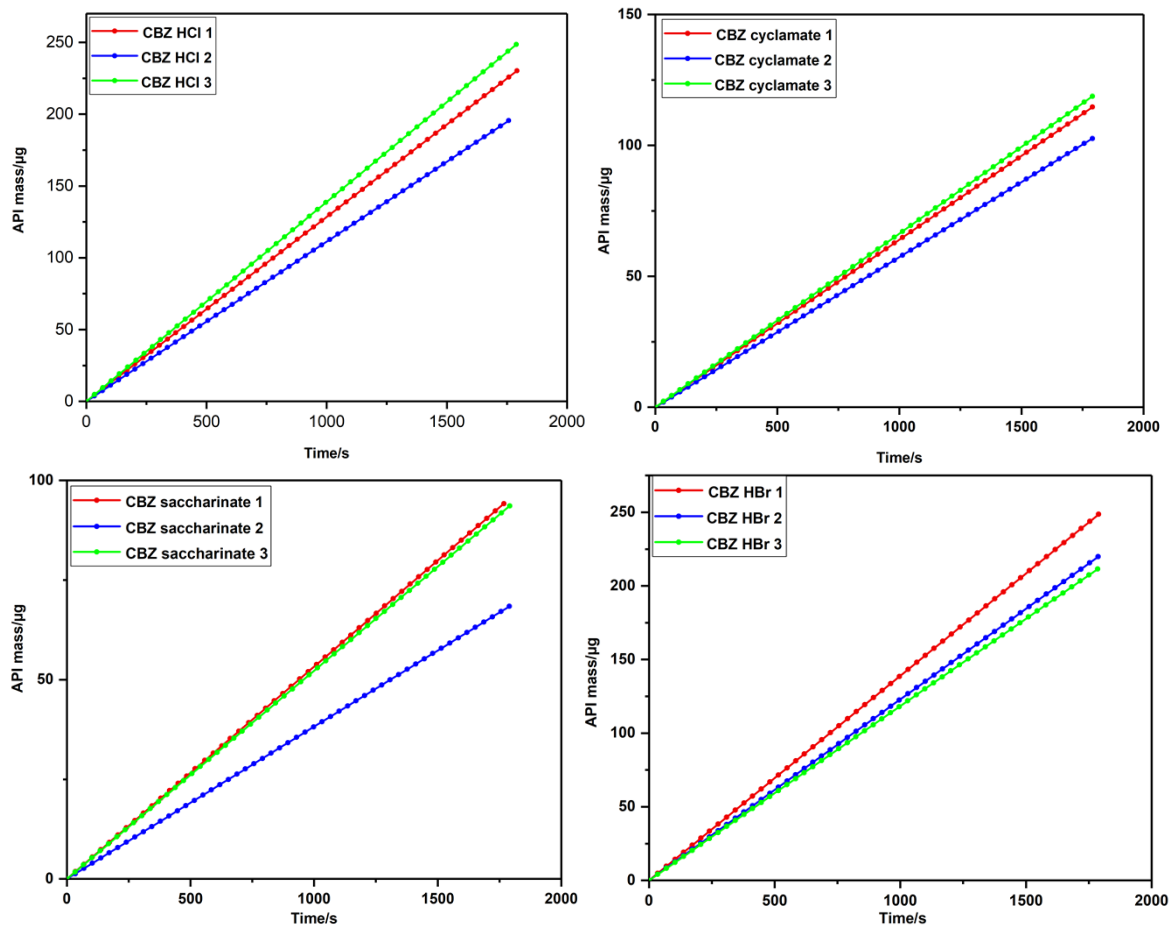

IDR curves of CBZ. HBr, CBZ. HCl and CBZ L malate recorded in FaSSIF

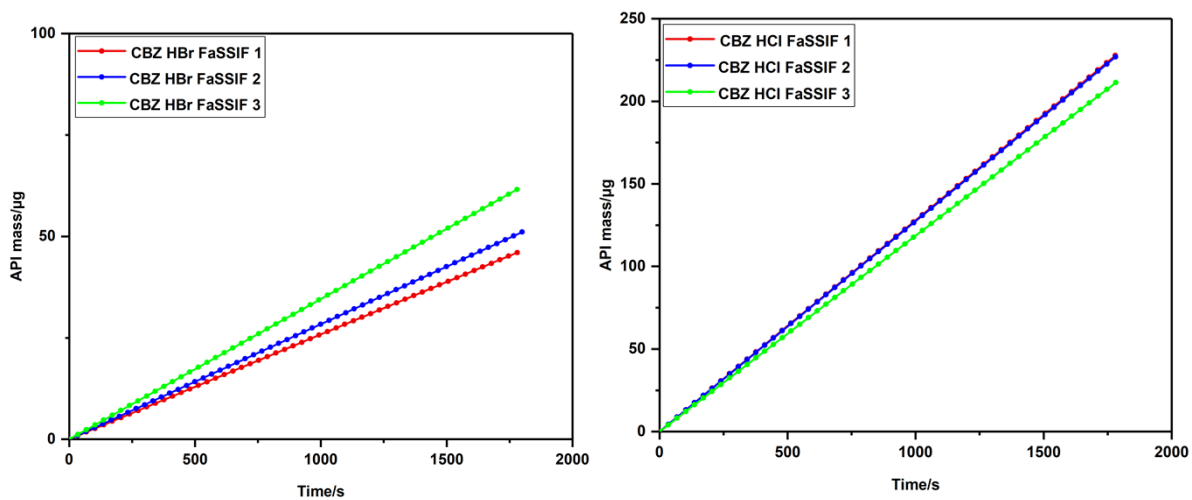

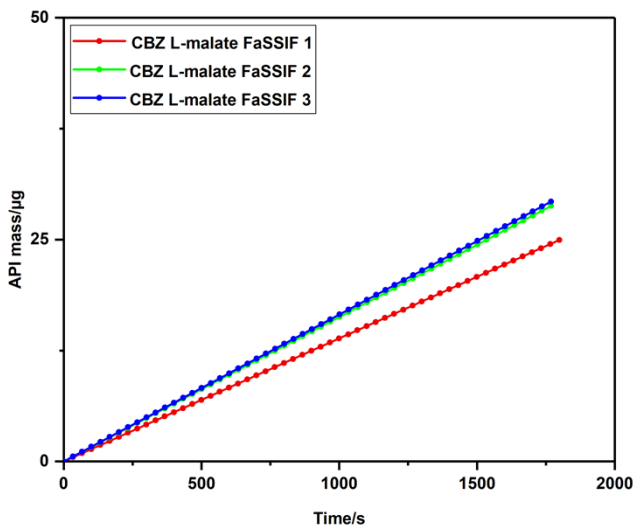

IDR curves of CBZ. HBr, CBZ. HCl and CBZ L\_malate recorded in FeSSIF

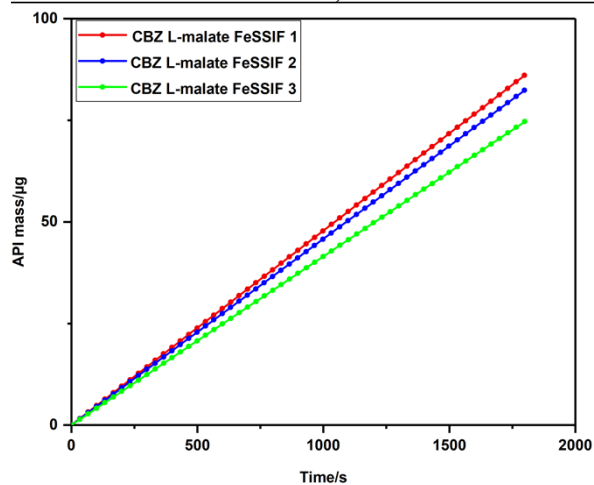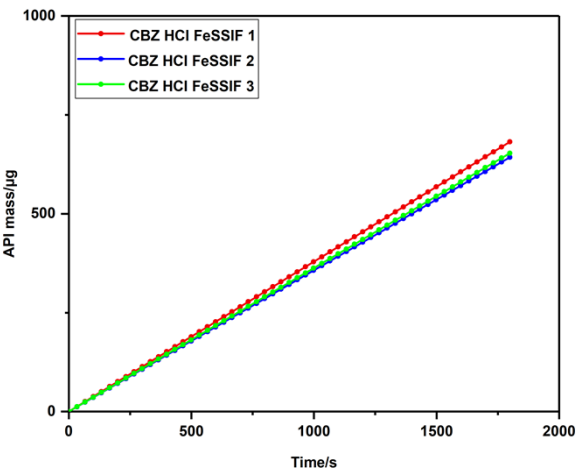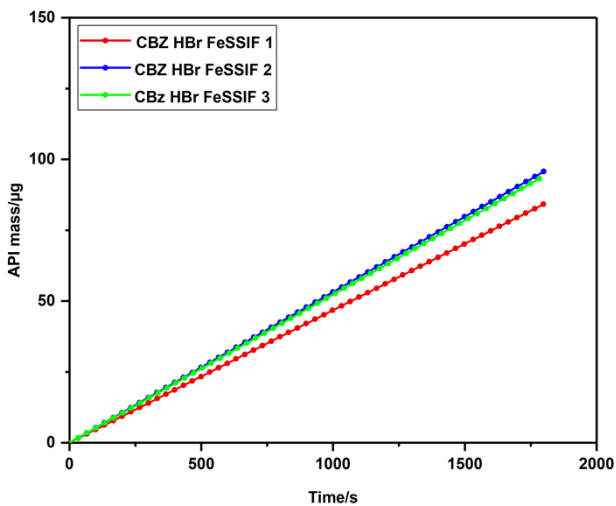

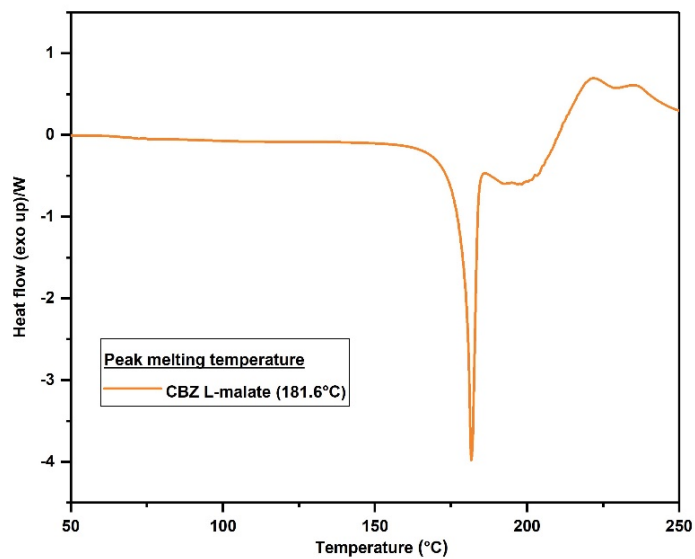

Fig S4 DSC curve of CBZ L-malate salt

### Section S3

### TGA curves

a)

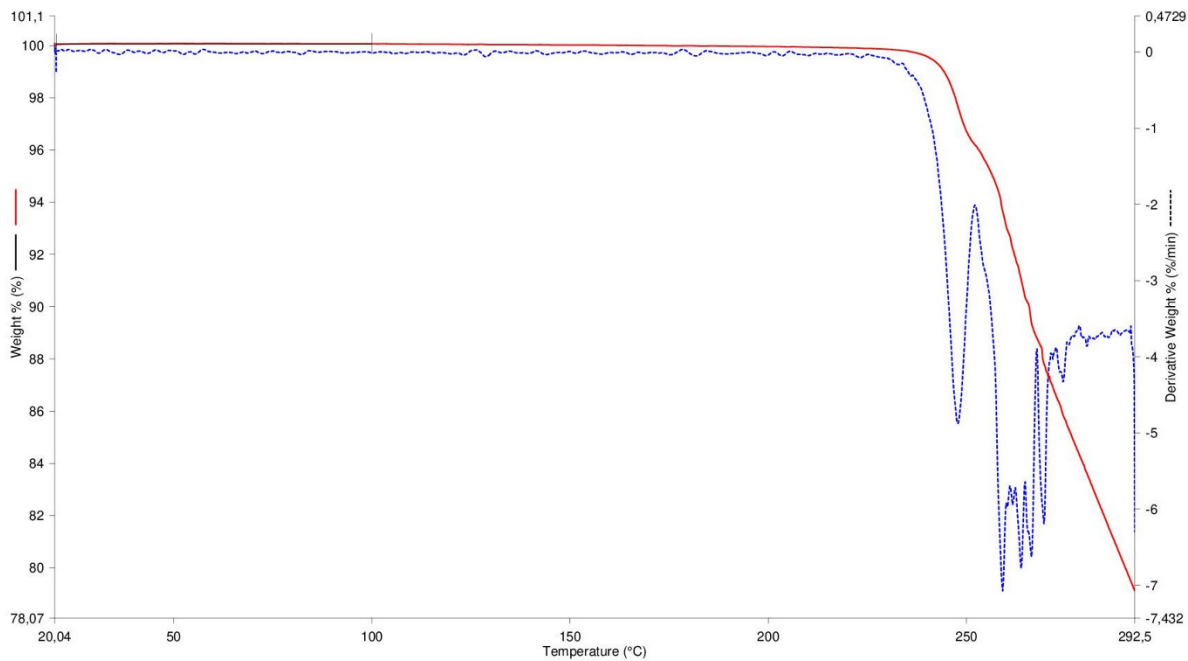

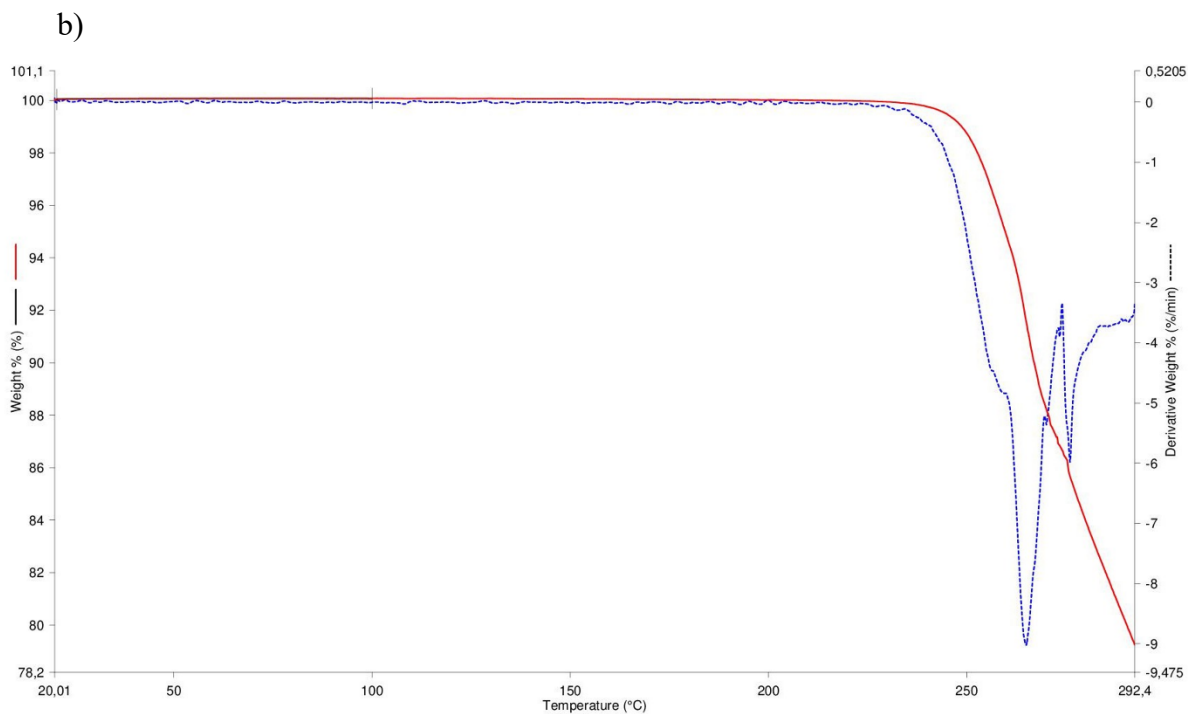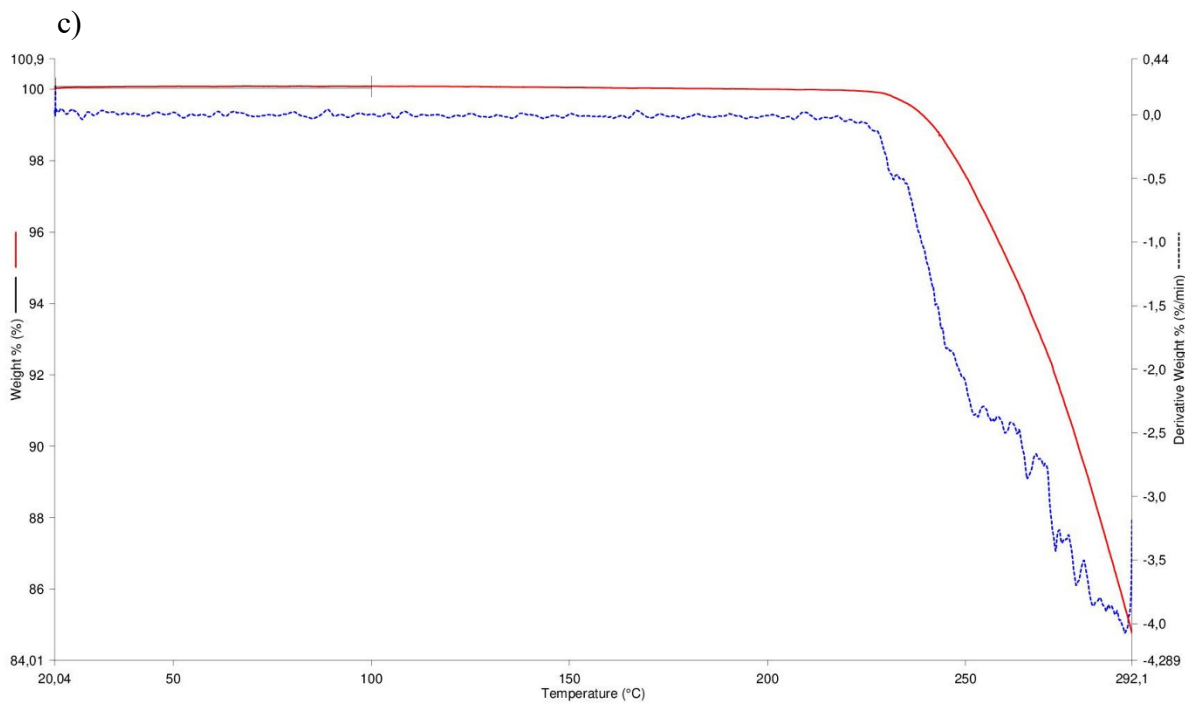

Fig S5 TGA curves of a)CBZ. HBr b)CBZ. HCl c)CBZ



## Section S4

## DVS curves of CBZ. HBr and CBZ. HCl

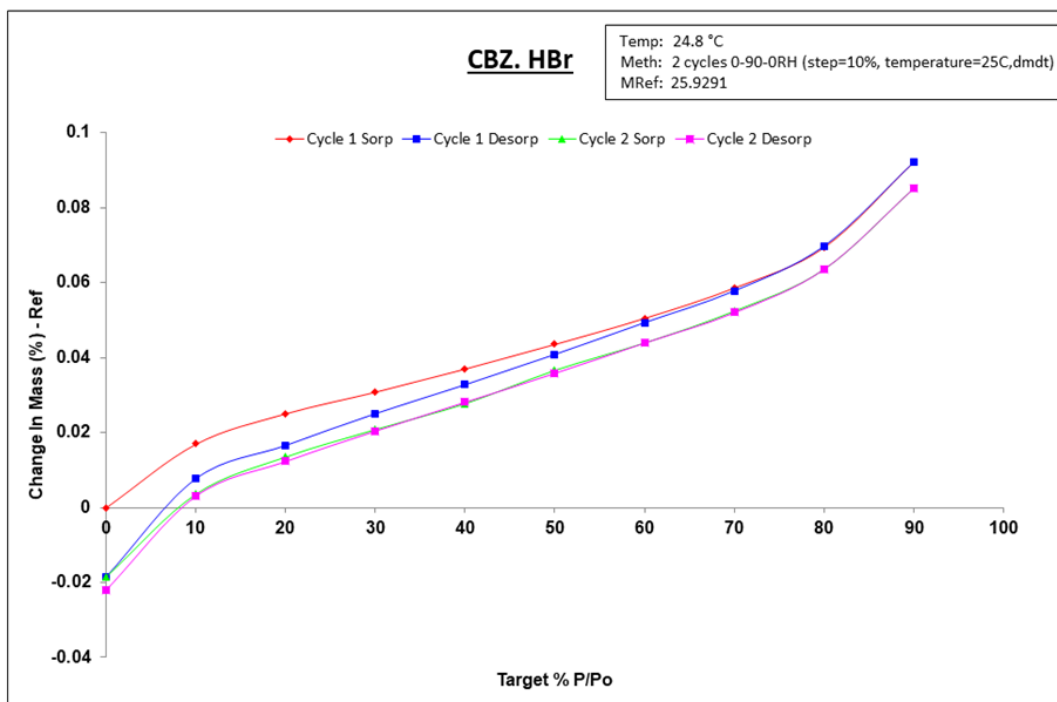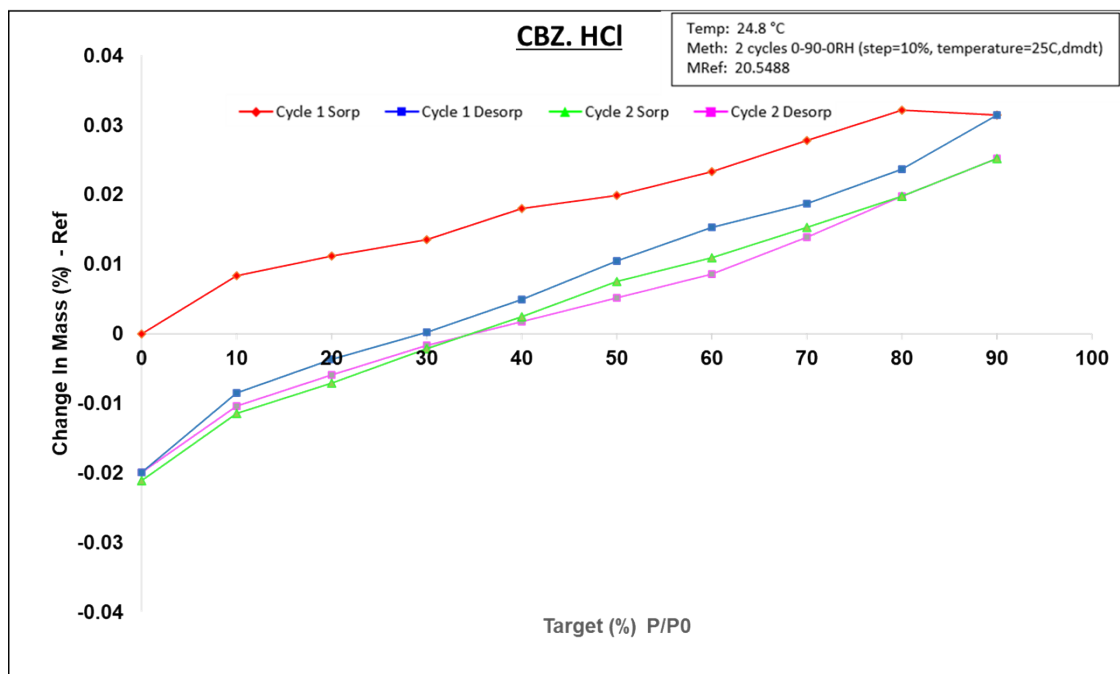

## Section S5

### Extra structural data

Drawings of the asymmetric parts of the molecules with labeled atoms are shown below. Tab.

S1 and Tab. S2 use the labeling as shown:

#### 1. CBZ. HBr

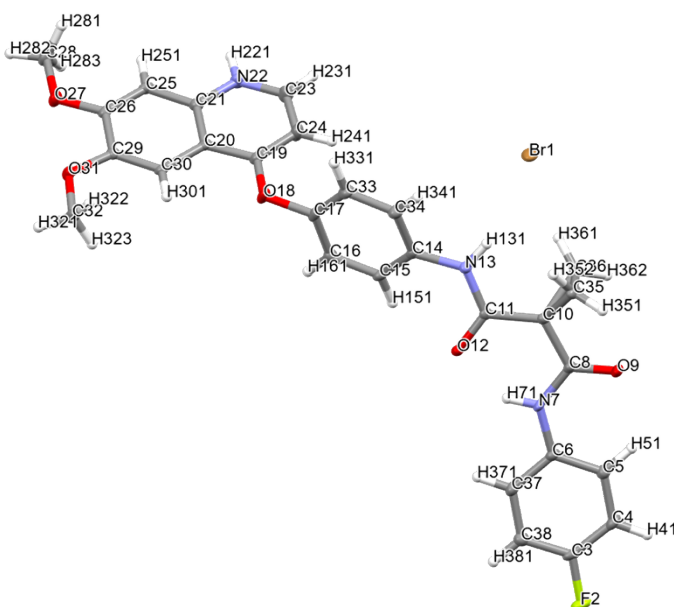

#### 2. CBZ. HCl

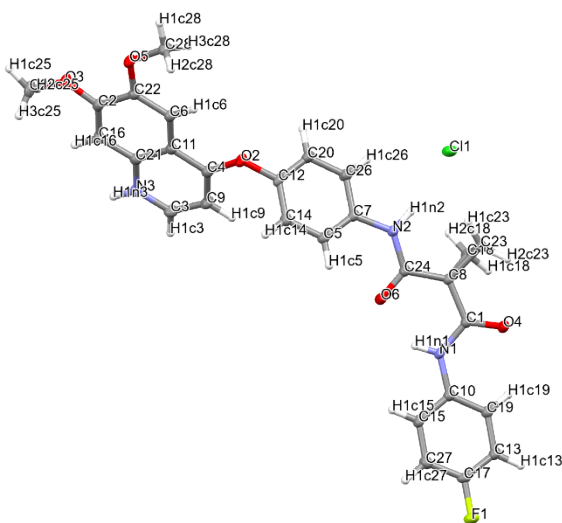

#### 3. CBZ saccharinate

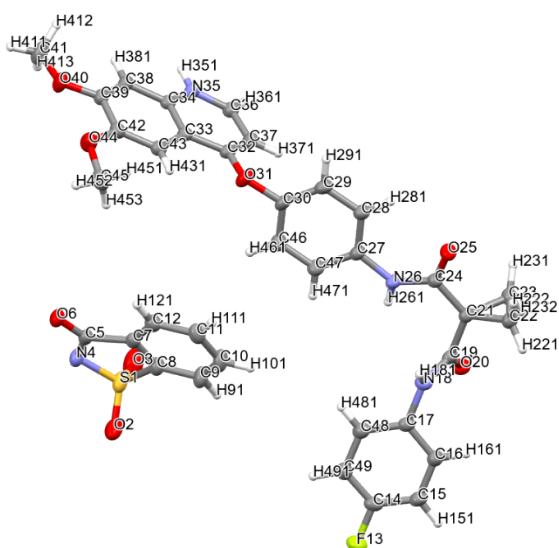

Table S1: Distances and angles of all the classical hydrogen bonds present in the salts of CBZ.

| Salt             | Interaction    | Distance(D---A)(Å) | Distance(D---H)(Å) | Angle(°) |
|------------------|----------------|--------------------|--------------------|----------|
| CBZ saccharinate | N18-H181---O25 | 2.791              | 0.883              | 172.57   |
|                  | N35--H351---O6 | 2.662              | 0.906              | 168.98   |
| CBZ. HBr         | N22-H221---Br1 | 3.167              | 0.869              | 174.48   |
|                  | N7-H71---O12   | 2.623              | 0.849              | 144.89   |
| CBZ. HCl         | N3-H1n3---C1   | 2.059              | 0.918              | 177.83   |
|                  | N1-H1n1---O6   | 1.921              | 0.854              | 143.75   |

Table S2: Further crystallographic data of salts of CBZ

|            | CBZ. HCl | CBZ. HBr | CBZ saccharinate |
|------------|----------|----------|------------------|
| Morphology | polygon  | polygon  | plate            |

|                                           |                |                |                |
|-------------------------------------------|----------------|----------------|----------------|
| T(K)                                      | 95             | 95             | 140            |
| Radiation                                 | Cu K $\alpha$  | Cu K $\alpha$  | Cu K $\alpha$  |
| $\rho_{\text{calc}}$ (g/cm <sup>3</sup> ) | 1.443          | 1.532          | 1.429          |
| reflns. collected                         | 14615          | 83998          | 33154          |
| indept. reflns.                           | 4881           | 4784           | 5706           |
| R(int)                                    | 0.0199         | 0.061          | 0.039          |
| GOF                                       | 1.641          | 1.0322         | 1.0167         |
| R1, wR2 [ $I > 2\sigma(I)$ ]              | 0.0330, 0.0951 | 0.0342, 0.0899 | 0.0376, 0.0945 |

### Section S6

Comparison of experimental XRD patterns and XRD patterns calculated from crystal structures

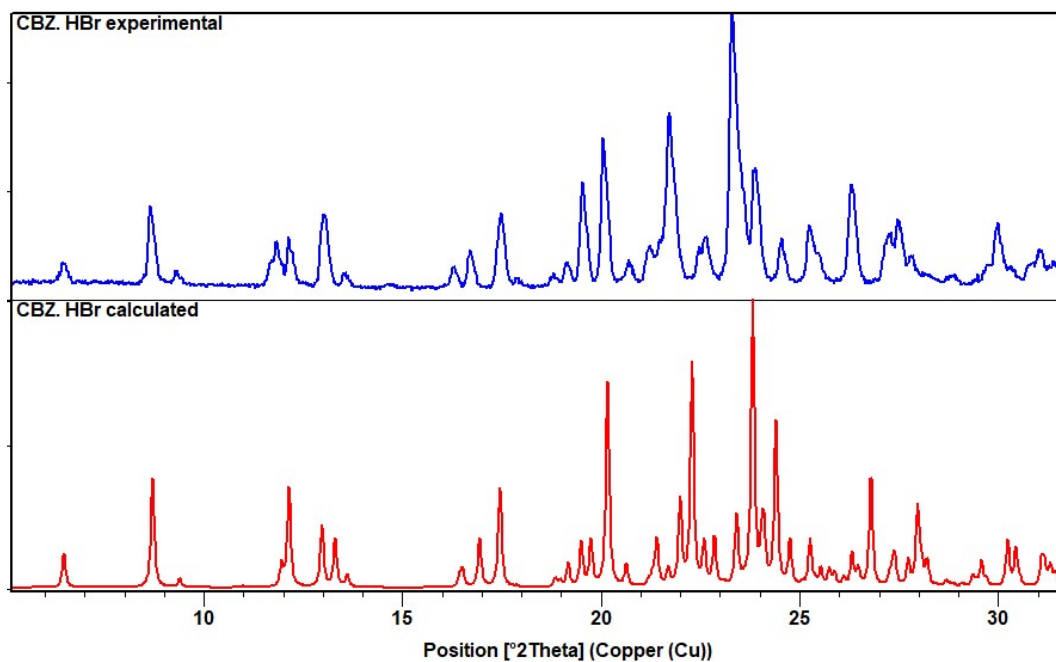

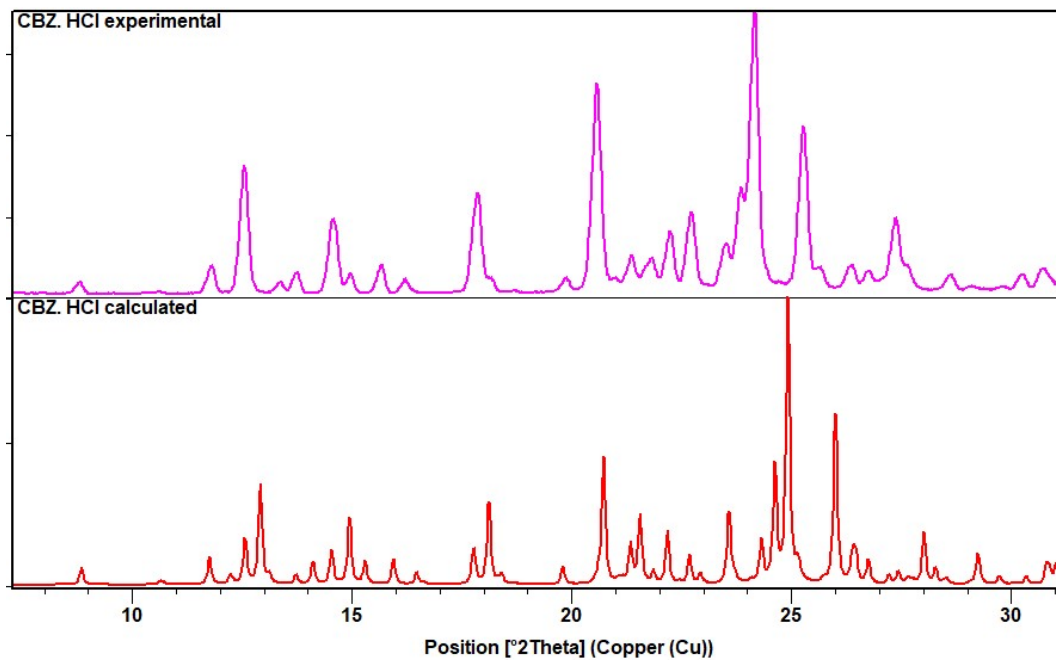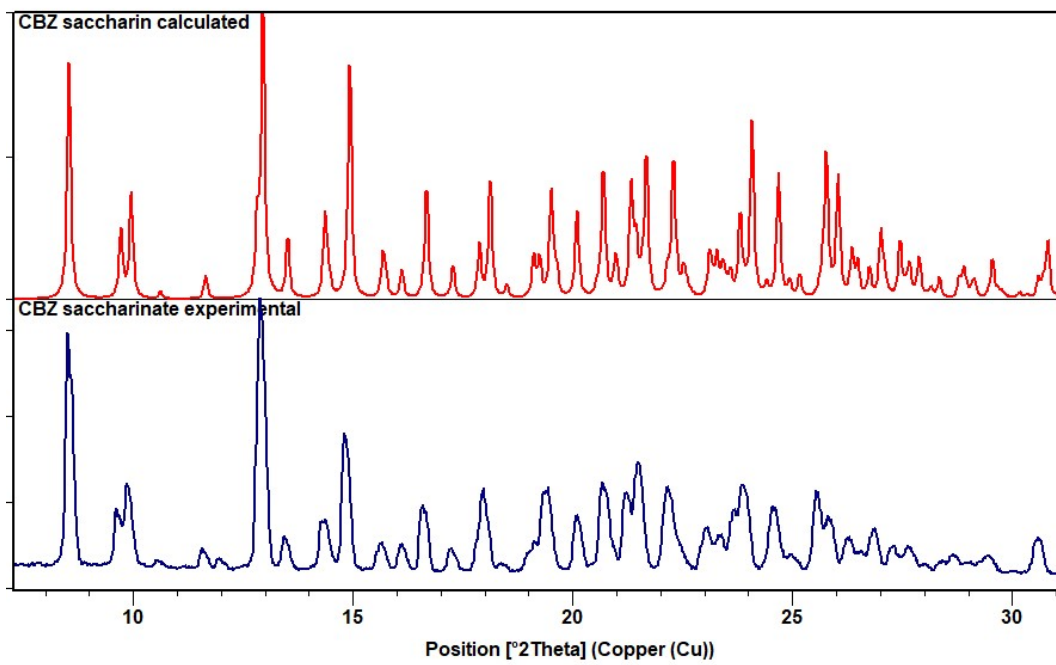

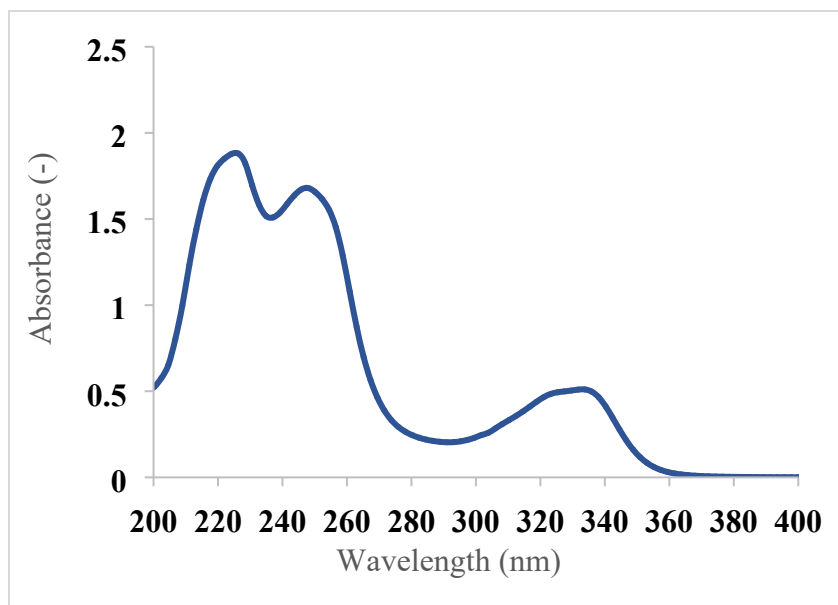

Fig. S6 UV-VIS absorbance of cabozantinib measured in phosphate buffer with 0.1% SDS
